# Supplementary material for: Routine lung volume recruitment in boys with Duchenne muscular dystrophy: a randomised clinical trial
Source: PubMed Central journal article supplement — Thorax. 2022 Mar 2;77(8):805–11. doi: 10.1136/thoraxjnl-2021-218196 (PMC9340020; doi:10.1136/thoraxjnl-2021-218196), 2022-03-02

**ONLINE SUPPLEMENT**

**Figure s1.** Estimated FVC %-predicted from a linear mixed effects model in boys with (a) baseline MIC-VC <10% of the FVC, and (b) baseline MIC-VC  $\geq$ 10% of the FVC.

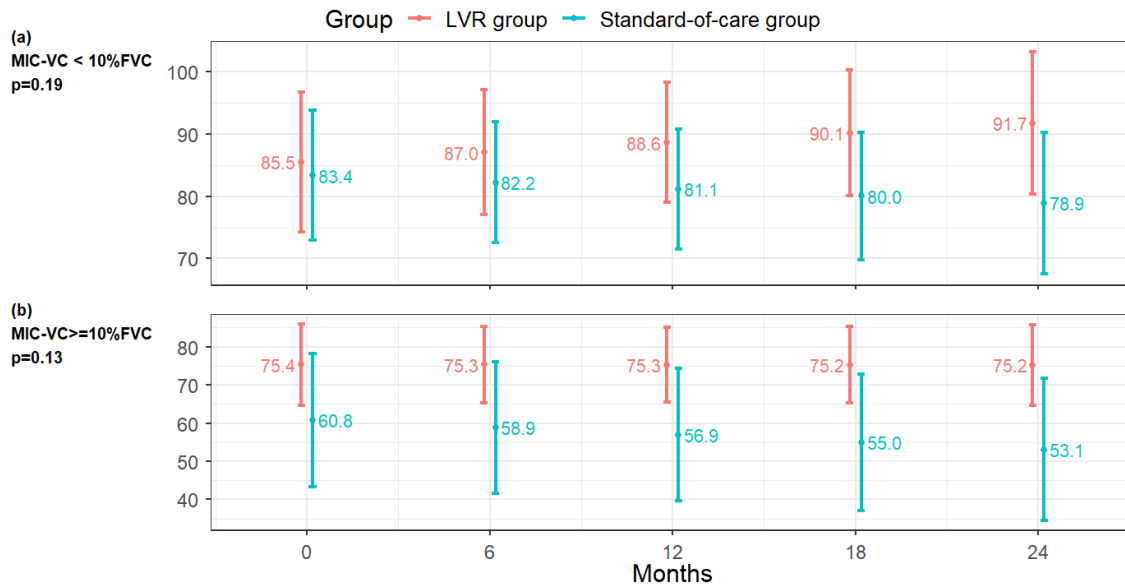

Supplement: thoraxjnl-2021-218196supp001.pdf [file thoraxjnl-2021-218196supp001.pdf]
